# Supplementary material for: Excretion of dengue virus RNA by Aedes aegypti allows non-destructive monitoring of viral dissemination in individual mosquitoes
Source: PubMed Central journal article supplement (PMC4846815; doi:10.1038/srep24885), 2016-04-27
Supplement: srep24885-s1.pdf [file srep24885-s1.pdf]

# **Excretion of dengue virus RNA by *Aedes aegypti* allows non-destructive monitoring of viral dissemination in individual mosquitoes**

Albin Fontaine<sup>1,2,3\*</sup>, Davy Jiolle<sup>1,3</sup>, Isabelle Moltini-Conclois<sup>1,3</sup>, Sebastian Lequime<sup>1,3,4</sup>, Louis Lambrechts<sup>1,3\*</sup>

<sup>1</sup> *Insect-Virus Interactions Group, Department of Genomes and Genetics, Institut Pasteur, Paris, France*

<sup>2</sup> *Equipe Résidente de Recherche d'Infectiologie Tropicale, Division Expertise, Institut de Recherche Biomédicale des Armées, Brétigny-sur-Orge, France*

<sup>3</sup> *Centre National de la Recherche Scientifique, Unité de Recherche Associée 3012, Paris, France*

<sup>4</sup> *Université Pierre et Marie Curie, Cellule Pasteur UPMC, Paris, France*

**\* Corresponding authors:** albinfont@gmail.com (AF); louis.lambrechts@pasteur.fr (LL).

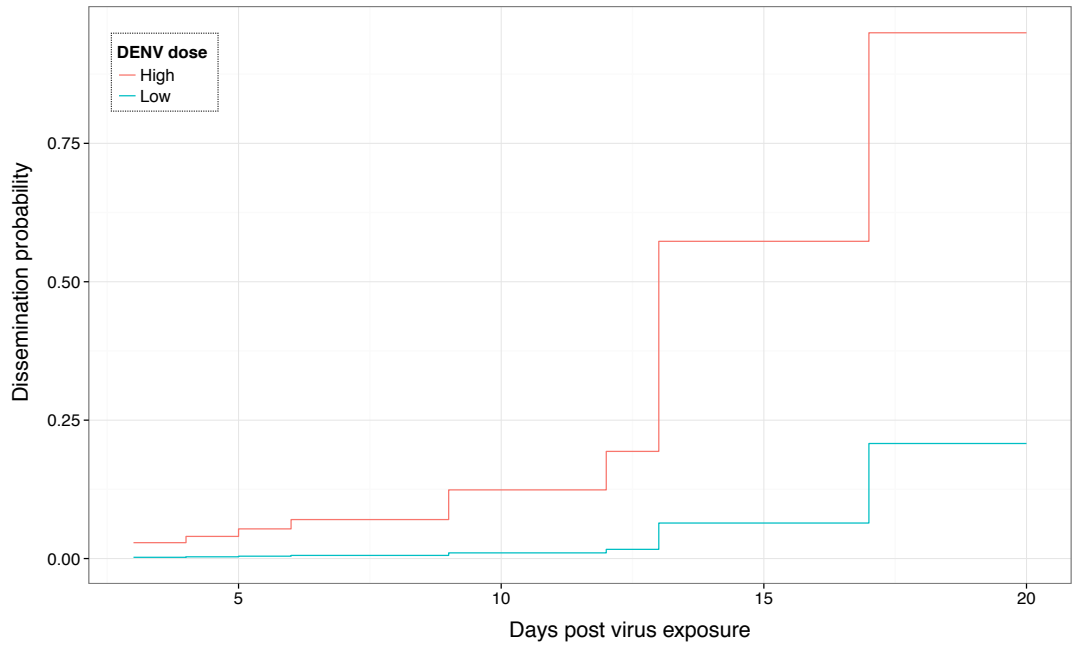

**Supplementary figure 1: Kaplan-Meier plot of the probability of viral dissemination as a function of virus dose.** Female mosquitoes were orally exposed to either  $10^7$  FFU/mL (high virus dose) or  $4.5 \times 10^5$  FFU/mL (low virus dose) of DENV and scored daily for the presence of DENV RNA in their excreta over 27 days. Presence of DENV RNA in mosquito excreta was used as a proxy for systemic viral dissemination.
